# Supplementary material for: Uncovering Flavivirus Host Dependency Factors through a Genome-Wide Gain-of-Function Screen
Source: MDPI journal article supplement (doi:10.3390/v11010068), 2019-01-15
Supplement: s1 [file s1]

## **Supplementary Materials**

### **Uncovering flavivirus host dependency factors through a genome-wide gain-of-function screen**

Evgeniya Petrova, Ségolène Gracias, Guillaume Beauclair, Frédéric Tangy, and Nolwenn Jouvenet

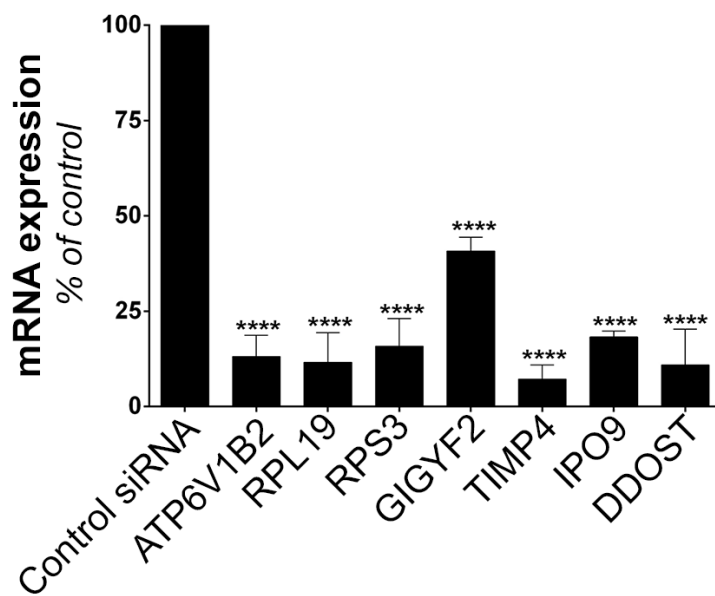

**Fig. S1. Validation of siRNA-mediated gene silencing.** Validation of siRNA-mediated gene silencing by RT-qPCR 48 hours after siRNA transfection of HeLa cells. Data are represented as mean  $\pm$  SD of three independent experiments. Significance was calculated using a one-way ANOVA test of comparisons to control siRNA-transfected samples.

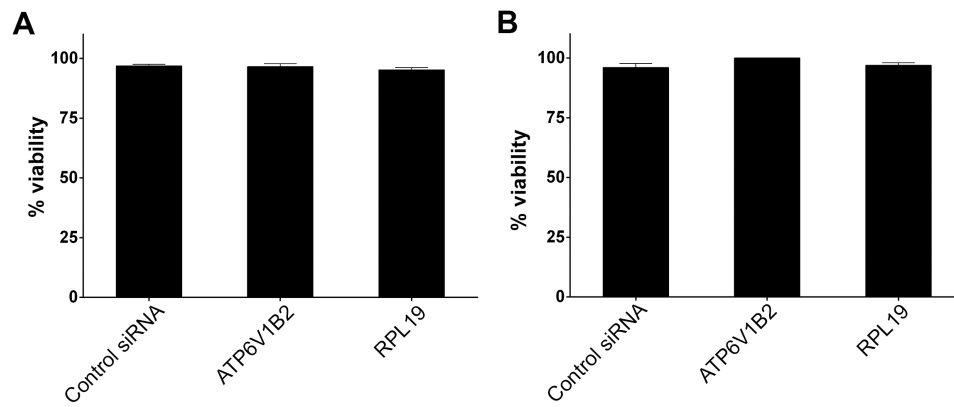

**Fig. S2. Cell viability determination following siRNA-mediated RPL19 silencing.** Percent viability of HeLa (A) or A549 (B) cells determined by trypan blue exclusion assays 48 hours after transfection with siRNA. Data are represented as mean  $\pm$  SD of three independent experiments.

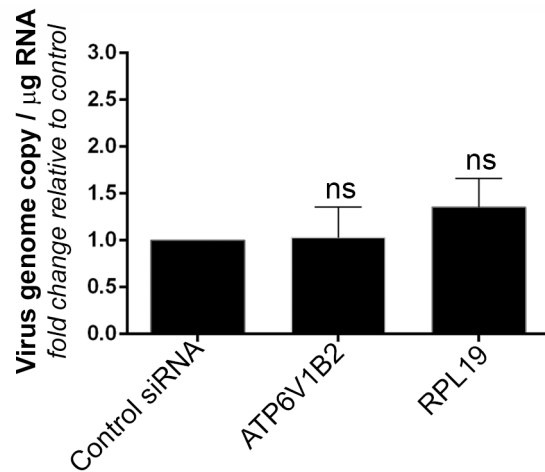

**Fig. S3. Silencing of RPL19 does not affect early stages of YFV replication.** HeLa cells were transfected with siRNA targeting RPL19 or ATP6V1B2 and 48 hours later infected with YFV at a MOI of 1. The relative amounts of cell-associated viral RNA were determined by qPCR analysis at 6 hours post-infection. Amounts of viral RNA are expressed as genome equivalents (GE) per µg of total RNA. Data are represented as mean  $\pm$  SD of three independent experiments. Significance was calculated using a one-way ANOVA test of comparisons to control siRNA-transfected samples.

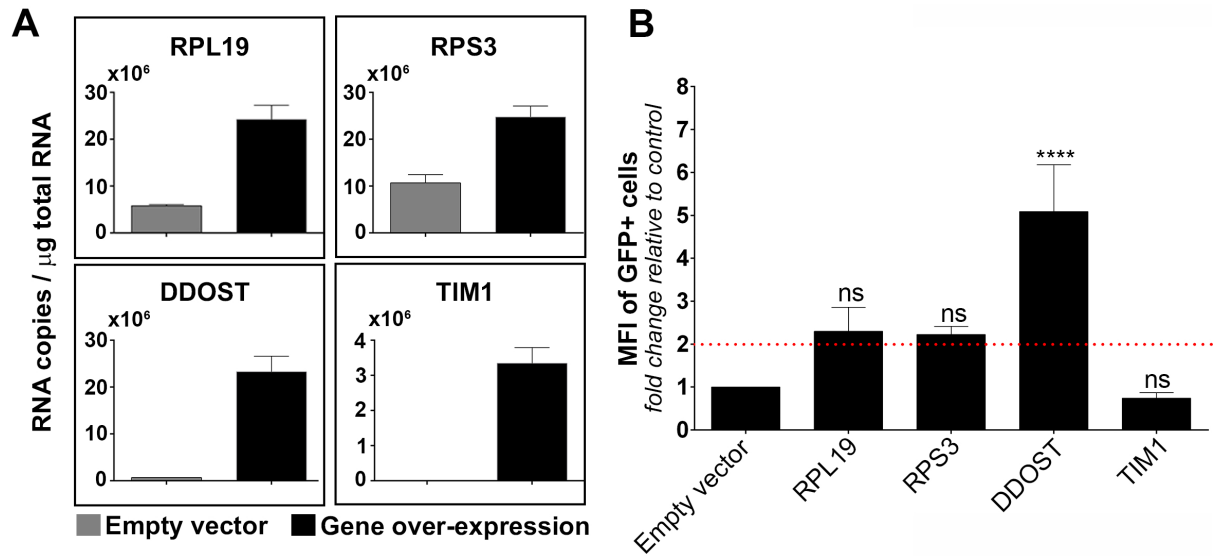

**Fig. S4. Validating the role of RPL19 on viral replication by an over-expression approach.** (A) Validation of gene over-expression in HT1080 stable cell lines by RT-qPCR. The results are expressed in RNA copies/ $\mu\text{g}$  of total RNA and are represented as mean  $\pm$  SD of three independent experiments. (B) Replicon assays were performed with YFV/WNV chimeric RVPs in HT1080 cell lines over-expressing RPL19, RPS3, DDOST or TIM-1. Median Fluorescence Intensity (MFI) of GFP positive cells were determined by flow cytometry analysis 48 hours post-infection and normalized to cells transduced with an empty vector. Data are represented as mean  $\pm$  SD of at least three independent experiments. Significance was calculated using one-way ANOVA tests of comparisons to empty vector cell line.

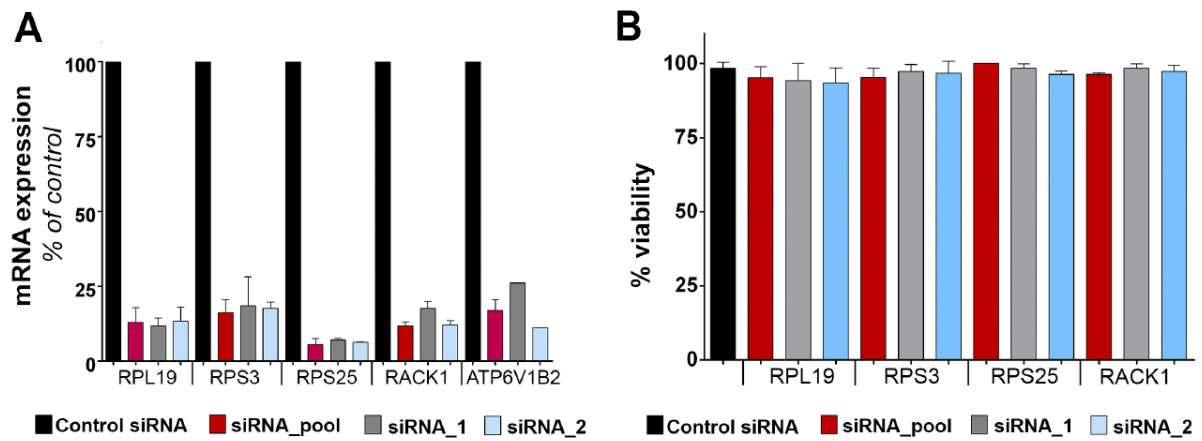

**Fig. S5. Cell viability determination following siRNA-mediated ribosomal gene silencing and validation of gene silencing efficiency.** (A) Comparison of gene silencing efficiency between two different siRNA oligos and a pool of siRNA oligos in HeLa cells. mRNA expression level of silenced genes was determined by RT-qPCR 48 hours post-transfection. (B) Percent viability of HeLa cells determined by trypan blue exclusion assay 48 hours after transfection with siRNA. Data are represented as mean  $\pm$  SD of three independent experiments.

| Target                | Provider                | siRNA type, reference number                          |
|-----------------------|-------------------------|-------------------------------------------------------|
| Non-targeting control | ThermoFischerScientific | Silencer® Select Negative control No.1 siRNA, 4390843 |
|                       | Dharmacon               | ON-TARGETplus SMARTpool, D-001810-10                  |
| GAPDH                 | Dharmacon               | ON-TARGETplus SMARTpool, D-001830-10                  |
| RPL19                 | ThermoFischerScientific | Silencer® Select Pre-Designed siRNA, ID: s12183       |
|                       |                         | Silencer® Select Pre-Designed siRNA, ID: s226957      |
| RPS3                  | ThermoFischerScientific | Silencer® Select Pre-Designed siRNA, ID: s12255       |
|                       |                         | Silencer® Select Pre-Designed siRNA, ID: s12256       |
|                       |                         | Silencer® Select Pre-Designed siRNA, ID: s25032       |
| GIGYF2                | ThermoFischerScientific | Silencer® Select Pre-Designed siRNA, ID: s25033       |
|                       |                         | Silencer® Select Pre-Designed siRNA, ID: s25034       |
|                       | Dharmacon               | ON-TARGETplus SMARTpool, L-013918-01                  |
| DDOST                 | ThermoFischerScientific | Silencer® Select Pre-Designed siRNA, ID: 3999         |
|                       | Dharmacon               | ON-TARGETplus SMARTpool, L-015786-01                  |
| TIMP4                 | Dharmacon               | ON-TARGETplus SMARTpool, L-011406-00                  |
| IPO9                  | ThermoFischerScientific | Silencer® Select Pre-Designed siRNA, ID: 31300        |
| ATP6V1B2              | ThermoFischerScientific | Silencer® Select Pre-Designed siRNA, ID: 7178         |
|                       |                         | Silencer® Select Pre-Designed siRNA, ID: 112786       |
| RPS25                 | ThermoFischerScientific | Silencer® Select Pre-Designed siRNA, ID: s12336       |
|                       |                         | Silencer® Select Pre-Designed siRNA, ID: s53506       |
| RACK1                 | ThermoFischerScientific | Silencer® Select Pre-Designed siRNA, ID: s20340       |
|                       |                         | Silencer® Select Pre-Designed siRNA, ID: s20341       |

**Table S1.** siRNA oligos used for gene silencing experiments.

| Target | Primer  | DNA sequence, 5'-3'                                                       |
|--------|---------|---------------------------------------------------------------------------|
|        |         | <i>attB1/attB2 sequence, gene-specific sequence</i>                       |
| RPL19  | forward | <u>GGGGACAAGTTTGTACAAAAAAGCAGGCTTCACC</u> <i>ATGAGTATGCTCAGGCTTCAG</i>    |
|        | reverse | <u>GGGGACCACTTTGTACAAGAAAGCTGGGTTTTATTATTTCTTGGTCTCTTCCTCCT</u>           |
| RPS3   | forward | <u>GGGGACAAGTTTGTACAAAAAAGCAGGCTTCACC</u> <i>ATGGCAGTGCAAATATCCAAGAAG</i> |
|        | reverse | <u>GGGGACCACTTTGTACAAGAAAGCTGGGTTTTATTATGCTGTGGGGACTGGCT</u>              |
| TIM1   | forward | <u>GGGGACAAGTTTGTACAAAAAAGCAGGCTTCACC</u> <i>ATGCATCCTCAAGTGGTC</i>       |
|        | reverse | <u>GGGGACCACTTTGTACAAGAAAGCTGGGTTTTATTAGTCCGTGGCATAAAGACTATTCTC</u>       |

**Table S2.** DNA sequence of primers used for cloning.



| Target        | Primer  | DNA sequence, 5'- 3'        | Reference                     |
|---------------|---------|-----------------------------|-------------------------------|
| YFV NS3       | forward | GCGTAAGGCTGGAAAGAGTG        | -                             |
|               | reverse | CTTCCTCCCTTCATCCACAA        |                               |
| WNV<br>Capsid | forward | CCGCGTGTTGTCCTTGATT         | Fernandez-Garcia et al., 2010 |
|               | reverse | GCCCCTTGCCGTCGAT            |                               |
| ZIKV NS5      | forward | AARTACACATAACCARAACAAAGTGGT | Faye et al., 2013             |
|               | reverse | TCCRCTCCCYCTYTGGTCTTG       |                               |
| GAPDH         | forward | GGTCGGAGTCAACGGATTTG        | -                             |
|               | reverse | ACTCCACGACGTACTCAGCG        |                               |
| RPL19         | forward | GGGCATAGGTAAGCGGAAGG        | Bee et al., 2011              |
|               | reverse | TCAGGTACAGGCTGTGATACA       |                               |
| RPS3          | forward | GCGAGTTACACCAACCAGGA        | -                             |
|               | reverse | CCCTCTGGAAAGCCAAACCT        |                               |
| GIGYF2        | forward | ACGCAGACACTGAACTTTGG        | -                             |
|               | reverse | CATTTCTTCTCTGCCGTAACGA      |                               |
| DDOST         | forward | CCGACATTGGTGACCCTCTTC       | -                             |
|               | reverse | TCAGCCACGATGAGCGTATG        |                               |
| TIMP4         | forward | AACTGTGGCTGCCAAATCAC        | -                             |
|               | reverse | GCTTTCGTTCCAACAGCCAG        |                               |
| ATP6V1B2      | forward | GAGGGGCAGATCTATGTGGA        | Coffey et al., 2014           |
|               | reverse | GCATGATCCTTCCTGGTCAT        |                               |
| RPS25         | forward | GGACGACAAGAAGAAGAAGGAC      | -                             |
|               | reverse | GAACCTTGCCTTTGGACCACT       |                               |
| RACK1         | forward | TAACCGCTACTGGCTGTGTG        | -                             |
|               | reverse | GTTCTGCCTTGCTGCTGGTA        |                               |
| IPO9          | forward | AGATGTTGGTGAGCGGAGAC        | -                             |
|               | reverse | CTGGGAGAATGACAGGAGCA        |                               |
| TIM1          | forward | CCAGTAGCCACTTCACCATCTTCAC   | Zhao et al, 2010              |
|               | reverse | CGGTGTCATTCCCATCTGTTGTG     |                               |

**Table S3.** DNA sequence of primers used for real-time qPCR.
